# Supplementary material for: Dual-Intended Deep Learning Model for Breast Cancer Diagnosis in Ultrasound Imaging
Source: MDPI journal article supplement (doi:10.3390/cancers14112663), 2022-05-27
Supplement: s1 [file s1]

# Supplementary Materials: Dual-Intended Deep Learning Model for Breast Cancer Diagnosis in Ultrasound Imaging

Nicolle Vigil, Madeline Barry, Arya Amini, Moulay Akhloufi, Xavier P.V. Maldague, Lan Ma, Lei Ren, Bardia Yousefi

**Table S1.** Computational time of the designed deep learning model.

| Computational                                                       | Time      | Memory    |
|---------------------------------------------------------------------|-----------|-----------|
| Loading hyperparameters to Deep Convolutional Autoencoder structure | 5.8 secs  | 2.8 MByte |
| One epoch of the model<br>Batch size = 8                            | 86.5 secs | 8.7 MByte |
| Extracting Deep-radiomics                                           | 6.3 secs  | 8.9 MByte |
| SpectralEmbedding                                                   | 0.1 secs  | 9.0 MByte |
| Random Forest                                                       | 0.2 secs  | 2.6 MByte |

**Table S2.** More detailed information about the Radiomic features used in this study.

| Radiomic                                      | features                                                                                                                     | information |
|-----------------------------------------------|------------------------------------------------------------------------------------------------------------------------------|-------------|
| Quantization method                           | Fixed-bin width                                                                                                              |             |
| Bin-width size                                | 25                                                                                                                           |             |
| Median bin counts (range) for original image  | 90 (40–140)                                                                                                                  |             |
| Median bin counts (range) for all the filters | 85 (30–120)                                                                                                                  |             |
| Laplacian of Gaussian (LoG)                   | LoG with 10 sigma levels (0–5mm, strides of 0.5mm)<br>For each level, 18 features from first-order statistics were extracted |             |
| Wavelet                                       | Three channels<br>For each level, 18 features from first-order statistics were extracted                                     |             |

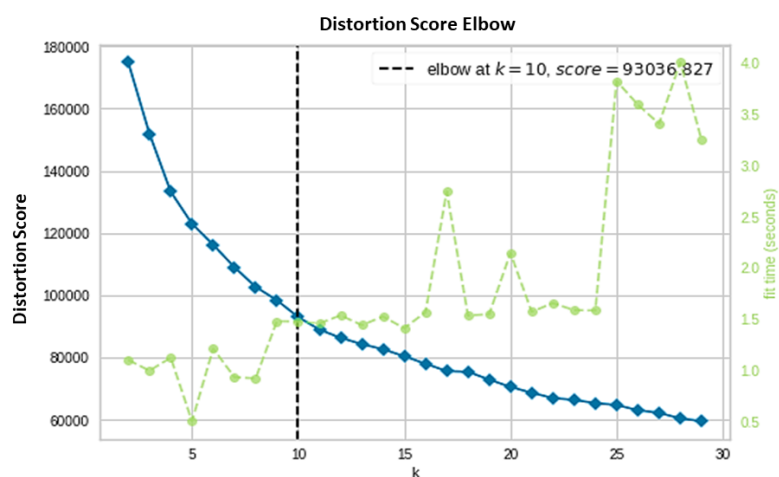

**Figure S1.** Elbow technique to calculate the distortion score and find out the optimum number of the cluster for conventional radiomics. The  $k = 10$  and  $k = 12$  are both optimum numbers, shown by the graph, where we select  $k = 12$  for this study.

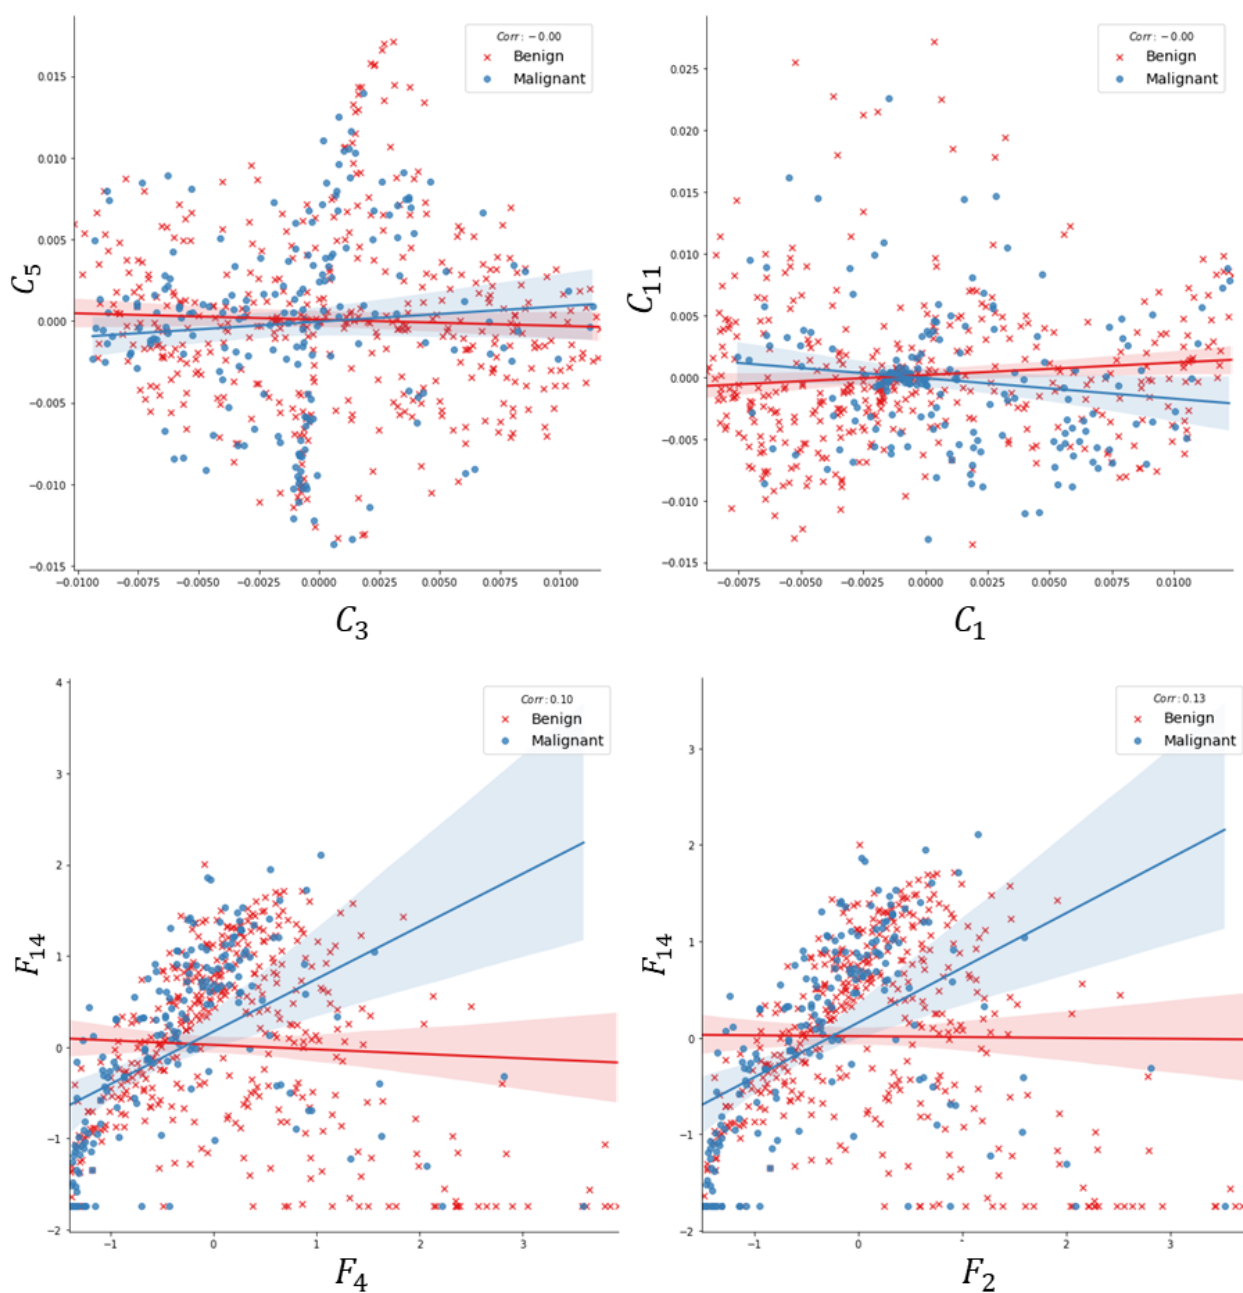

**Figure S2.** Regression analysis for benign and malignant lesions for four conventional radiomics and four deep radiomics show the significant dissimilarity of the paired feature groups stating independence of these features as predictive imaging biomarkers.

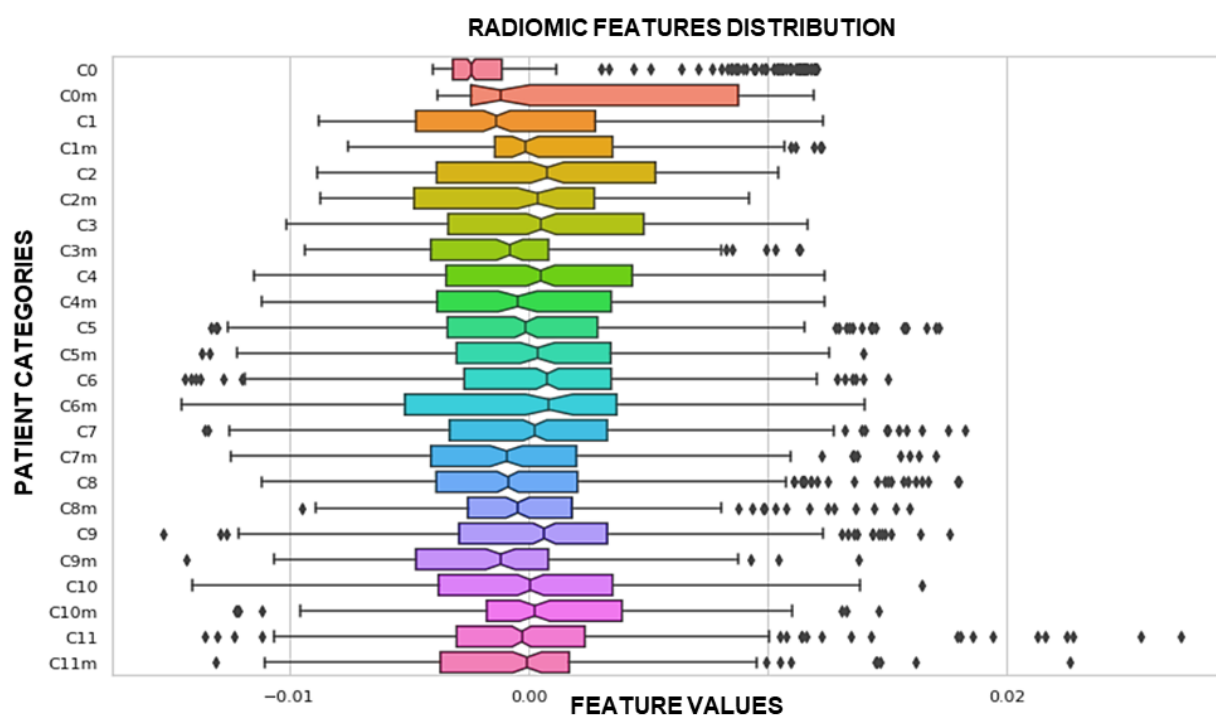

**Figure S3.** Distribution of conventional radiomics and their effect on diagnosis for malignant and benign lesions are presented in the following boxplots for 12 radiomic groups. Two subsets of patients with malignant lesions, shown by “m” versus benign lesions, without any suffix are compared statistically using the Wilcoxon test.

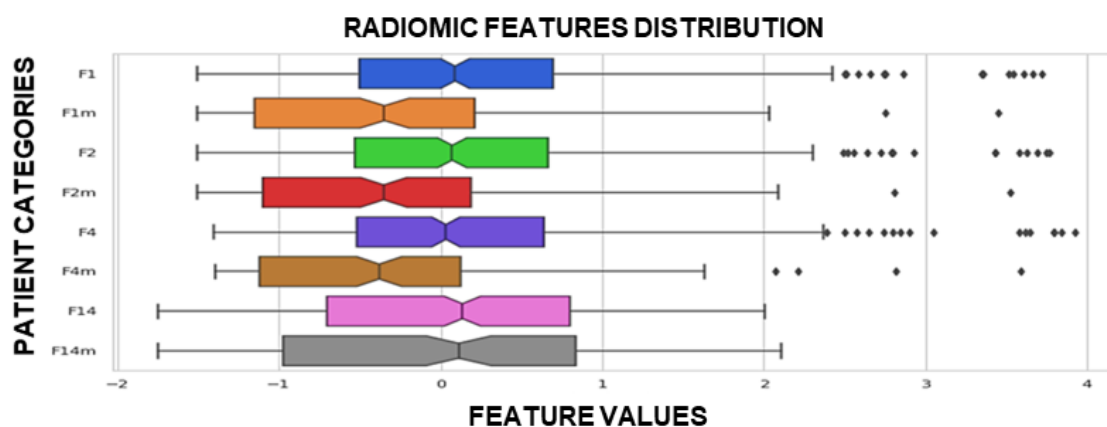

**Figure S4.** The distribution of Deep radiomics and their classification strength are presented in the following boxplots for two subsets of patients with the malignant lesion, shown by “m” versus benign lesions. This analysis is performed using the Wilcoxon test, which presents the significance statistic among radiomics generated by the proposed deep neural network model.

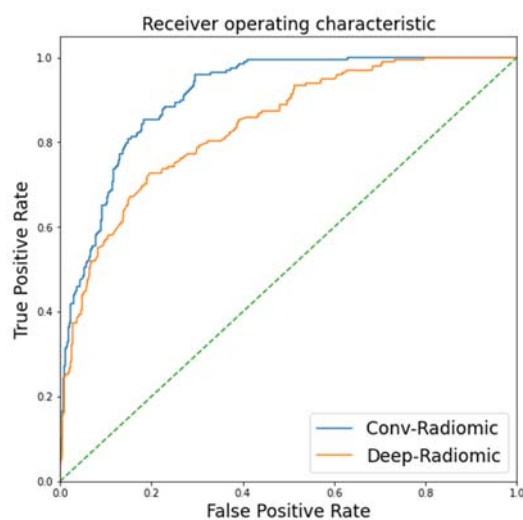

**Figure S5.** The receiver operating characteristic (ROC) curves for different multivariate models using conventional and deep radiomic features. Vertical and horizontal axes in the ROC represent sensitivity and 1- specificity of the model.

### S1. Grid Search Hyperparameter Tunning

We have performed hyperparameter tuning using Grid search algorithm for a range of given hyperparameters applying K-fold cross-validation. For  $k = 5$ , our maximal random forest model was challenged by adding different range of number of the trees (10-128), maximum depth (2-7), and random state (40-80). This led to suggested systems' parameters, No. est. = 16, Max depth = 4, Rand. state = 80, yielded an accuracy of 75.3% (62.5%-80.4%), which very close to the reported accuracy for leave-one-out cross-validation for the closely related parameters (See Table 2). Table S3 presents the hyperparameter scores obtained by the model and their scores and optimization time.

**Table S3.** The hyperparameter scoring obtained by grid search and 5-fold cross validation of the model and their scores and optimization time.

| Grid Search Hyperparameter tuning |          |             |                      |                  |                 |                |                 |            |
|-----------------------------------|----------|-------------|----------------------|------------------|-----------------|----------------|-----------------|------------|
| Max Depth                         | No. Est. | Rand. State | Average Fitting Time | STD Fitting Time | Mean Test Score | STD Test Score | Rank Test Score | Test Score |
| 2                                 | 10       | 40          | 0.017                | 0.002            | 0.674           | 0.056          |                 | 138        |
| 2                                 | 10       | 50          | 0.015                | 0.001            | 0.677           | 0.063          |                 | 126        |
| 2                                 | 10       | 60          | 0.019                | 0.002            | 0.665           | 0.041          |                 | 158        |
| 2                                 | 10       | 70          | 0.018                | <0.001           | 0.66            | 0.05           |                 | 160        |
| 2                                 | 10       | 80          | 0.017                | 0.001            | 0.679           | 0.037          |                 | 110        |
| 2                                 | 16       | 40          | 0.026                | <0.001           | 0.682           | 0.042          |                 | 98         |
| 2                                 | 16       | 50          | 0.026                | <0.001           | 0.679           | 0.058          |                 | 110        |
| 2                                 | 16       | 60          | 0.025                | <0.001           | 0.666           | 0.039          |                 | 156        |
| 2                                 | 16       | 70          | 0.027                | 0.002            | 0.665           | 0.049          |                 | 158        |
| 2                                 | 16       | 80          | 0.026                | 0.002            | 0.671           | 0.054          |                 | 145        |
| 2                                 | 20       | 40          | 0.035                | 0.003            | 0.683           | 0.045          |                 | 90         |
| 2                                 | 20       | 50          | 0.033                | 0.002            | 0.679           | 0.061          |                 | 110        |
| 2                                 | 20       | 60          | 0.03                 | <0.001           | 0.677           | 0.046          |                 | 128        |
| 2                                 | 20       | 70          | 0.03                 | 0.003            | 0.669           | 0.056          |                 | 149        |
| 2                                 | 20       | 80          | 0.03                 | 0.001            | 0.674           | 0.05           |                 | 138        |
| 2                                 | 32       | 40          | 0.051                | 0.003            | 0.687           | 0.051          |                 | 71         |
| 2                                 | 32       | 50          | 0.047                | 0.002            | 0.674           | 0.054          |                 | 138        |
| 2                                 | 32       | 60          | 0.047                | 0.001            | 0.677           | 0.05           |                 | 128        |
| 2                                 | 32       | 70          | 0.048                | 0.002            | 0.668           | 0.059          |                 | 153        |

|   |     |    |       |        |       |       |     |
|---|-----|----|-------|--------|-------|-------|-----|
| 2 | 32  | 80 | 0.054 | 0.002  | 0.68  | 0.046 | 106 |
| 2 | 64  | 40 | 0.097 | 0.004  | 0.683 | 0.056 | 90  |
| 2 | 64  | 50 | 0.1   | 0.005  | 0.668 | 0.059 | 153 |
| 2 | 64  | 60 | 0.098 | 0.004  | 0.674 | 0.052 | 135 |
| 2 | 64  | 70 | 0.105 | 0.005  | 0.669 | 0.056 | 149 |
| 2 | 64  | 80 | 0.091 | 0.001  | 0.679 | 0.045 | 120 |
| 2 | 70  | 40 | 0.102 | 0.002  | 0.682 | 0.055 | 98  |
| 2 | 70  | 50 | 0.108 | 0.011  | 0.671 | 0.06  | 146 |
| 2 | 70  | 60 | 0.102 | 0.001  | 0.672 | 0.05  | 141 |
| 2 | 70  | 70 | 0.105 | 0.005  | 0.669 | 0.056 | 149 |
| 2 | 70  | 80 | 0.102 | 0.002  | 0.679 | 0.045 | 120 |
| 2 | 80  | 40 | 0.118 | 0.003  | 0.679 | 0.053 | 120 |
| 2 | 80  | 50 | 0.117 | 0.002  | 0.668 | 0.062 | 153 |
| 2 | 80  | 60 | 0.12  | 0.005  | 0.672 | 0.059 | 141 |
| 2 | 80  | 70 | 0.126 | 0.007  | 0.671 | 0.053 | 146 |
| 2 | 80  | 80 | 0.12  | 0.003  | 0.679 | 0.045 | 120 |
| 2 | 128 | 40 | 0.194 | 0.01   | 0.68  | 0.05  | 106 |
| 2 | 128 | 50 | 0.244 | 0.062  | 0.666 | 0.062 | 156 |
| 2 | 128 | 60 | 0.19  | 0.003  | 0.672 | 0.055 | 141 |
| 2 | 128 | 70 | 0.193 | 0.004  | 0.671 | 0.057 | 146 |
| 2 | 128 | 80 | 0.192 | 0.009  | 0.676 | 0.051 | 132 |
| 4 | 10  | 40 | 0.019 | 0.003  | 0.674 | 0.08  | 135 |
| 4 | 10  | 50 | 0.018 | <0.001 | 0.685 | 0.075 | 81  |
| 4 | 10  | 60 | 0.018 | <0.001 | 0.682 | 0.066 | 101 |
| 4 | 10  | 70 | 0.018 | 0.001  | 0.687 | 0.078 | 71  |
| 4 | 10  | 80 | 0.02  | <0.001 | 0.691 | 0.091 | 32  |
| 4 | 16  | 40 | 0.031 | 0.001  | 0.674 | 0.082 | 135 |
| 4 | 16  | 50 | 0.028 | 0.002  | 0.679 | 0.061 | 110 |
| 4 | 16  | 60 | 0.028 | 0.002  | 0.672 | 0.082 | 141 |
| 4 | 16  | 70 | 0.028 | <0.001 | 0.687 | 0.086 | 71  |
| 4 | 16  | 80 | 0.031 | 0.002  | 0.707 | 0.081 | 1   |
| 4 | 20  | 40 | 0.038 | 0.001  | 0.683 | 0.079 | 90  |
| 4 | 20  | 50 | 0.037 | 0.001  | 0.685 | 0.071 | 81  |
| 4 | 20  | 60 | 0.039 | 0.004  | 0.687 | 0.067 | 78  |
| 4 | 20  | 70 | 0.034 | 0.002  | 0.691 | 0.078 | 32  |
| 4 | 20  | 80 | 0.034 | 0.001  | 0.706 | 0.082 | 2   |
| 4 | 32  | 40 | 0.056 | 0.002  | 0.691 | 0.077 | 32  |
| 4 | 32  | 50 | 0.061 | 0.004  | 0.691 | 0.065 | 32  |
| 4 | 32  | 60 | 0.057 | 0.001  | 0.696 | 0.072 | 14  |
| 4 | 32  | 70 | 0.053 | <0.001 | 0.688 | 0.088 | 53  |
| 4 | 32  | 80 | 0.059 | 0.005  | 0.688 | 0.083 | 53  |

|   |     |    |       |        |       |       |     |
|---|-----|----|-------|--------|-------|-------|-----|
| 4 | 64  | 40 | 0.107 | 0.003  | 0.693 | 0.079 | 23  |
| 4 | 64  | 50 | 0.109 | 0.003  | 0.688 | 0.074 | 53  |
| 4 | 64  | 60 | 0.118 | 0.005  | 0.693 | 0.08  | 23  |
| 4 | 64  | 70 | 0.111 | 0.006  | 0.696 | 0.089 | 14  |
| 4 | 64  | 80 | 0.11  | 0.004  | 0.696 | 0.083 | 14  |
| 4 | 70  | 40 | 0.132 | 0.004  | 0.693 | 0.079 | 23  |
| 4 | 70  | 50 | 0.125 | 0.008  | 0.688 | 0.071 | 53  |
| 4 | 70  | 60 | 0.121 | 0.006  | 0.693 | 0.074 | 23  |
| 4 | 70  | 70 | 0.123 | 0.007  | 0.691 | 0.086 | 32  |
| 4 | 70  | 80 | 0.124 | 0.007  | 0.702 | 0.078 | 4   |
| 4 | 80  | 40 | 0.142 | 0.004  | 0.698 | 0.075 | 10  |
| 4 | 80  | 50 | 0.146 | 0.007  | 0.688 | 0.078 | 53  |
| 4 | 80  | 60 | 0.137 | 0.004  | 0.687 | 0.082 | 71  |
| 4 | 80  | 70 | 0.143 | 0.008  | 0.69  | 0.086 | 48  |
| 4 | 80  | 80 | 0.147 | 0.006  | 0.702 | 0.08  | 4   |
| 4 | 128 | 40 | 0.224 | 0.017  | 0.691 | 0.074 | 32  |
| 4 | 128 | 50 | 0.217 | 0.007  | 0.688 | 0.087 | 53  |
| 4 | 128 | 60 | 0.226 | 0.011  | 0.679 | 0.084 | 110 |
| 4 | 128 | 70 | 0.222 | 0.008  | 0.688 | 0.085 | 53  |
| 4 | 128 | 80 | 0.225 | 0.009  | 0.693 | 0.081 | 23  |
| 5 | 10  | 40 | 0.028 | 0.003  | 0.704 | 0.078 | 3   |
| 5 | 10  | 50 | 0.044 | 0.015  | 0.688 | 0.068 | 53  |
| 5 | 10  | 60 | 0.029 | 0.003  | 0.677 | 0.064 | 126 |
| 5 | 10  | 70 | 0.02  | 0.002  | 0.682 | 0.077 | 98  |
| 5 | 10  | 80 | 0.018 | <0.001 | 0.688 | 0.063 | 53  |
| 5 | 16  | 40 | 0.029 | 0.001  | 0.699 | 0.09  | 6   |
| 5 | 16  | 50 | 0.029 | <0.001 | 0.687 | 0.076 | 71  |
| 5 | 16  | 60 | 0.029 | 0.001  | 0.679 | 0.081 | 110 |
| 5 | 16  | 70 | 0.029 | 0.002  | 0.69  | 0.087 | 48  |
| 5 | 16  | 80 | 0.032 | 0.001  | 0.69  | 0.068 | 48  |
| 5 | 20  | 40 | 0.037 | 0.002  | 0.698 | 0.088 | 10  |
| 5 | 20  | 50 | 0.035 | 0.001  | 0.699 | 0.074 | 6   |
| 5 | 20  | 60 | 0.035 | 0.001  | 0.683 | 0.091 | 90  |
| 5 | 20  | 70 | 0.034 | <0.001 | 0.691 | 0.084 | 32  |
| 5 | 20  | 80 | 0.04  | 0.003  | 0.699 | 0.083 | 6   |
| 5 | 32  | 40 | 0.063 | 0.002  | 0.691 | 0.087 | 32  |
| 5 | 32  | 50 | 0.062 | <0.001 | 0.691 | 0.082 | 32  |
| 5 | 32  | 60 | 0.061 | 0.001  | 0.687 | 0.093 | 71  |
| 5 | 32  | 70 | 0.057 | 0.003  | 0.688 | 0.087 | 53  |
| 5 | 32  | 80 | 0.056 | 0.002  | 0.696 | 0.089 | 14  |
| 5 | 64  | 40 | 0.112 | 0.004  | 0.68  | 0.084 | 106 |
| 5 | 64  | 50 | 0.119 | 0.002  | 0.687 | 0.088 | 78  |

|   |     |    |       |        |       |       |     |
|---|-----|----|-------|--------|-------|-------|-----|
| 5 | 64  | 60 | 0.111 | 0.002  | 0.679 | 0.085 | 110 |
| 5 | 64  | 70 | 0.111 | 0.002  | 0.699 | 0.083 | 6   |
| 5 | 64  | 80 | 0.11  | 0.002  | 0.685 | 0.097 | 81  |
| 5 | 70  | 40 | 0.122 | 0.002  | 0.693 | 0.082 | 23  |
| 5 | 70  | 50 | 0.122 | 0.003  | 0.685 | 0.091 | 88  |
| 5 | 70  | 60 | 0.128 | 0.005  | 0.679 | 0.088 | 110 |
| 5 | 70  | 70 | 0.133 | 0.004  | 0.696 | 0.089 | 14  |
| 5 | 70  | 80 | 0.121 | 0.001  | 0.682 | 0.097 | 101 |
| 5 | 80  | 40 | 0.14  | 0.002  | 0.688 | 0.083 | 53  |
| 5 | 80  | 50 | 0.152 | 0.006  | 0.691 | 0.084 | 32  |
| 5 | 80  | 60 | 0.14  | 0.002  | 0.679 | 0.087 | 110 |
| 5 | 80  | 70 | 0.15  | 0.009  | 0.693 | 0.087 | 23  |
| 5 | 80  | 80 | 0.14  | 0.003  | 0.691 | 0.095 | 32  |
| 5 | 128 | 40 | 0.237 | 0.008  | 0.683 | 0.086 | 90  |
| 5 | 128 | 50 | 0.224 | 0.004  | 0.685 | 0.082 | 81  |
| 5 | 128 | 60 | 0.225 | 0.002  | 0.679 | 0.094 | 110 |
| 5 | 128 | 70 | 0.222 | 0.002  | 0.696 | 0.089 | 14  |
| 5 | 128 | 80 | 0.232 | 0.005  | 0.688 | 0.093 | 53  |
| 6 | 10  | 40 | 0.02  | 0.001  | 0.688 | 0.087 | 53  |
| 6 | 10  | 50 | 0.022 | 0.001  | 0.685 | 0.077 | 81  |
| 6 | 10  | 60 | 0.021 | 0.001  | 0.669 | 0.086 | 149 |
| 6 | 10  | 70 | 0.021 | 0.001  | 0.676 | 0.089 | 132 |
| 6 | 10  | 80 | 0.021 | 0.001  | 0.68  | 0.072 | 106 |
| 6 | 16  | 40 | 0.033 | <0.001 | 0.688 | 0.098 | 53  |
| 6 | 16  | 50 | 0.033 |        | 0.685 | 0.079 | 88  |
| 6 | 16  | 60 | 0.032 |        | 0.677 | 0.093 | 128 |
| 6 | 16  | 70 | 0.033 |        | 0.698 | 0.103 | 13  |
| 6 | 16  | 80 | 0.03  |        | 0.688 | 0.072 | 53  |
| 6 | 20  | 40 | 0.036 | <0.001 | 0.693 | 0.095 | 23  |
| 6 | 20  | 50 | 0.037 |        | 0.688 | 0.079 | 53  |
| 6 | 20  | 60 | 0.036 |        | 0.691 | 0.098 | 47  |
| 6 | 20  | 70 | 0.04  |        | 0.679 | 0.098 | 120 |
| 6 | 20  | 80 | 0.04  |        | 0.676 | 0.084 | 132 |
| 6 | 32  | 40 | 0.065 | 0.003  | 0.698 | 0.105 | 10  |
| 6 | 32  | 50 | 0.065 | 0.003  | 0.694 | 0.081 | 22  |
| 6 | 32  | 60 | 0.059 | 0.001  | 0.682 | 0.099 | 101 |
| 6 | 32  | 70 | 0.058 | 0.001  | 0.683 | 0.101 | 95  |
| 6 | 32  | 80 | 0.059 | 0.002  | 0.687 | 0.081 | 71  |
| 6 | 64  | 40 | 0.118 | 0.005  | 0.691 | 0.108 | 32  |
| 6 | 64  | 50 | 0.122 | 0.004  | 0.682 | 0.091 | 101 |
| 6 | 64  | 60 | 0.117 | 0.003  | 0.696 | 0.105 | 14  |
| 6 | 64  | 70 | 0.115 | 0.002  | 0.683 | 0.093 | 95  |
| 6 | 64  | 80 | 0.117 | 0.002  | 0.679 | 0.101 | 120 |
| 6 | 70  | 40 | 0.129 | 0.002  | 0.696 | 0.097 | 14  |

---

|   |     |    |       |       |       |       |     |
|---|-----|----|-------|-------|-------|-------|-----|
| 6 | 70  | 50 | 0.129 | 0.003 | 0.682 | 0.092 | 101 |
| 6 | 70  | 60 | 0.135 | 0.004 | 0.685 | 0.096 | 81  |
| 6 | 70  | 70 | 0.13  | 0.003 | 0.688 | 0.09  | 53  |
| 6 | 70  | 80 | 0.127 | 0.003 | 0.677 | 0.093 | 128 |
| 6 | 80  | 40 | 0.155 | 0.007 | 0.693 | 0.1   | 23  |
| 6 | 80  | 50 | 0.149 | 0.008 | 0.683 | 0.092 | 95  |
| 6 | 80  | 60 | 0.149 | 0.005 | 0.691 | 0.1   | 32  |
| 6 | 80  | 70 | 0.149 | 0.005 | 0.688 | 0.094 | 53  |
| 6 | 80  | 80 | 0.146 | 0.005 | 0.691 | 0.099 | 32  |
| 6 | 128 | 40 | 0.241 | 0.01  | 0.69  | 0.092 | 52  |
| 6 | 128 | 50 | 0.242 | 0.012 | 0.687 | 0.094 | 78  |
| 6 | 128 | 60 | 0.234 | 0.004 | 0.69  | 0.104 | 48  |
| 6 | 128 | 70 | 0.247 | 0.011 | 0.691 | 0.09  | 32  |
| 6 | 128 | 80 | 0.235 | 0.007 | 0.685 | 0.1   | 81  |

---
